# Supplementary material for: Effect of thermal formation/dissociation cycles on the kinetics of formation and pore-scale distribution of methane hydrates in porous media: a magnetic resonance imaging study
Source: Royal Society of Chemistry journal article supplement (doi:10.1039/d0se01705a), 2021-01-01
Supplement: d0se01705a3.xlsx [file d0se01705a3.xlsx]

## Sheet: MI vs Time for Synthetic
MI Variations vs. Time for the Synthetic Sediment Sample
Time (min)	MI (-)	System Temperature (°C)	Remarks
0	4638.28	2	Fully saturated with water at P = 7 MPa
63	1511.82	2	Partially saturated with water at P = 3 MPa
82.6667	1538.63	11	Partially saturated with water at P = 7 MPa
84.8	1470.77	11
86.9333	1420.35	11
89.0667	1393.96	11
91.2	1370	11
93.3333	1357.49	11
95.4667	1351.69	11
97.6	1355.63	11
99.7333	1347.65	11
101.867	1346.76	11
104	1330.4	11
120.467	1354.91	2	C#1, Formation The induction time is marked with diagonal stripes.
122.6	1352.1	2
124.733	1352.4	2
126.867	1373.1	2
129	1393.95	2
131.133	1411.47	2
133.267	1427.12	2
135.4	1443.25	2
137.533	1456.22	2
139.667	1453.82	2
141.8	1465.87	2
143.933	1468.53	2
146.067	1300.36	2
148.2	1267.91	2
150.333	1301.54	2
152.467	1291.67	2
154.6	1308.2	2
156.733	1316.03	2
158.867	1334.25	2
161	1342.03	2
163.467	1359.35	2
165.6	1356.02	2
167.733	1341.2	2
169.867	1334.52	2
172	1337.37	2
174.133	1333.21	2
176.267	1331.93	2
178.4	1355.11	2
180.533	1359.65	2
182.667	1377.7	2
184.8	1379.6	2
186.933	1362.59	2
189.067	1356.54	2
191.2	1357.39	2
193.333	1365.5	2
195.467	1363.38	2
197.6	1353.52	2
199.733	1362.62	2
201.867	1372.73	2
204	1392.98	2
205.467	1379.78	2
207.6	1372.04	2
209.733	1368.5	2
211.867	1342.76	2
214	1341.39	2
216.133	1332.28	2
218.267	1337.83	2
220.4	1344.85	2
222.533	1357.04	2
224.667	1353.4	2
226.8	1353.82	2
228.933	1350.59	2
231.067	1347.97	2
233.2	1344.95	2
235.333	1341.4	2
237.467	1334.01	2
239.6	1346.96	2
241.733	1360.34	2
243.867	1357.48	2
246	1355.9	2
248.467	1343.8	2
250.6	1350.41	2
252.733	1347.31	2
254.867	1342.5	2
257	1344.84	2
259.133	1342.44	2
261.267	1312.41	2
263.4	1307.61	2
265.533	1310.37	2
267.667	1298.46	2
269.8	1220.14	2
271.933	1220.09	2
274.067	1207.79	2
276.2	1206.29	2
278.333	1200.69	2
280.467	1222.2	2
282.6	1223.71	2
284.733	1226.82	2
286.867	1226.7	2
289	1230.91	2
291.467	1222.18	2
293.6	1220.41	2
295.733	1213.38	2
297.867	1215.25	2
300	1222.33	2
302.133	1224.95	2
304.267	1235.8	2
306.4	1221.42	2
308.533	1216.12	2
310.667	1221.05	2
312.8	1228	2
314.933	1218.96	2
317.067	1219.86	2
319.2	1223.29	2
321.333	1225.68	2
323.467	1230.62	2
325.6	1232.66	2
327.733	1222.91	2
329.867	1221.91	2
332	1218.57	2
333.467	1219.66	2
335.6	1215.24	2
337.733	1221.45	2
339.867	1233.94	2
342	1239.87	2
344.133	1231.23	2
346.267	1222.82	2
348.4	1218.65	2
350.533	1204.71	2
352.667	1214.41	2
354.8	1204.46	2
356.933	1215.65	2
359.067	1217.59	2
361.2	1230.1	2
363.333	1235.09	2
365.467	1221.7	2
367.6	1221.42	2
369.733	1213.87	2
371.867	1047.21	2
374	1042.55	2
376.467	1038.13	2
378.6	1047.79	2
380.733	1043.69	2
382.867	1052.28	2
385	1044.06	2
387.133	1040.59	2
389.267	1031.61	2
391.4	1038.01	2
393.533	1038.79	2
395.667	1027.96	2
397.8	1034.27	2
399.933	1036.36	2
402.067	1041.31	2
404.2	1051.22	2
406.333	1039.87	2
408.467	1038.43	2
410.6	1042.04	2
412.733	1034.01	2
414.867	1036.5	2
417	1034.53	2
419.467	1042.03	2
421.6	1041.05	2
423.733	1040.17	2
425.867	1024.43	2
428	1016.99	2
430.133	1023.02	2
432.267	1029.36	2
434.4	1018.34	2
436.533	995.436	2
438.667	1000.98	2
440.8	1000.69	2
442.933	1011.23	2
445.067	1013.36	2
447.2	996.528	2
449.333	998.9	2
451.467	994.916	2
453.6	918.302	2
455.733	904.511	2
457.867	905.023	2
460	915.619	2
462.467	924.544	2
464.6	924.586	2
466.733	911.332	2
468.867	910.248	2
471	908.575	2
473.133	907.075	2
475.267	906.849	2
477.4	902.348	2
479.533	900.072	2
481.667	908.256	2
483.8	916.809	2
485.933	913.369	2
488.067	905.591	2
490.2	902.249	2
492.333	898.948	2
494.467	916.996	2
496.6	917.201	2
498.733	916.926	2
500.867	916.259	2
503	925.958	2
504.467	921.266	2
506.6	917.584	2
508.733	907.51	2
510.867	905.111	2
513	907.213	2
515.133	899.028	2
517.267	907.408	2
519.4	905.388	2
521.533	913.934	2
523.667	912.146	2
525.8	905.254	2
527.933	902.881	2
530.067	900.54	2
532.2	897.471	2
534.333	908.335	2
536.467	900.78	2
538.6	905.116	2
540.733	913.324	2
542.867	913.455	2
545	908.213	2
547.467	886.615	2
549.6	886.258	2
551.733	884.353	2
553.867	882.582	2
556	878.969	2
558.133	886.519	2
560.267	885.199	2
562.4	886.759	2
564.533	896.542	2
566.667	890.43	2
568.8	888.919	2
570.933	882.497	2
573.067	880.957	2
575.2	878.674	2
577.333	885.49	2
579.467	908.187	2
581.6	908.054	2
583.733	902.449	2
585.867	895.028	2
588	891.73	2
590.467	895.453	2
592.6	886.912	2
594.733	889.476	2
596.867	897.448	2
599	897.372	2
601.133	900.117	2
603.267	898.861	2
605.4	890.923	2
607.533	889.63	2
609.667	884.395	2
611.8	887.109	2
613.933	880.193	2
616.067	881.883	2
618.2	892.417	2
620.333	888.971	2
622.467	887.389	2
624.6	885.045	2
626.733	874.874	2
628.867	877.753	2
631	877.02	2
632.467	882.747	2
634.6	885.943	2
636.733	886.674	2
638.867	888.123	2
641	881.328	2
643.133	877.496	2
645.267	872.196	2
647.4	837.98	2
649.533	823.752	2
651.667	824.919	2
653.8	826.427	2
655.933	846.693	2
658.067	844.797	2
660.2	842.626	2
662.333	838.817	2
664.467	831.878	2
666.6	828.184	2
668.733	830.731	2
670.867	822.765	2
673	682.028	2
675.467	623.351	2
677.6	560.883	2
679.733	559.862	2
681.867	558.275	2
684	556.302	2
686.133	553.755	2
688.267	554.442	2
690.4	538.856	2
692.533	541.114	2
694.667	546.365	2
696.8	543.942	2
698.933	549.552	2
701.067	558.844	2
703.2	549.114	2
705.333	550.497	2
707.467	546.606	2
709.6	542.391	2
711.733	547.345	2
713.867	555.78	2
716	554.059	2
718.467	548.328	2
720.6	564.42	2
722.733	555.545	2
724.867	552.488	2
727	546.44	2
729.133	481.344	2
731.267	471.117	2
733.4	474.574	2
735.533	476.384	2
737.667	489.958	2
739.8	481.652	2
741.933	478.772	2
744.067	476.423	2
746.2	485.264	2
748.333	479.632	2
750.467	483.121	2
752.6	485.123	2
754.733	495.542	2
756.867	506.604	2
759	497.353	2
760.467	498.83	2
762.6	480.273	2
764.733	470.411	2
766.867	479.004	2
769	482.27	2
771.133	481.848	2
773.267	496.851	2
775.4	497.681	2
777.533	498.996	2
779.667	505.159	2
781.8	495.198	2
783.933	444.44	2
786.067	453.383	2
788.2	458.016	2
790.333	454.931	2
792.467	460.567	2
794.6	459.535	2
796.733	461.575	2
798.867	467.185	2
801	465.528	2
803.467	462.985	2
805.6	464.51	2
807.733	460.788	2
809.867	468.931	2
812	468.783	2
814.133	467.343	2
816.267	457.25	2
818.4	459.374	2
820.533	461.016	2
822.667	467.249	2
824.8	466.033	2
826.933	462.376	2
829.067	460.57	2
831.2	462.546	2
833.333	460.887	2
835.467	466.362	2
837.6	456.509	2
839.733	460.361	2
841.867	460.659	2
844	454.937	2
846.467	456.719	2
848.6	451.533	2
850.733	455.307	2
852.867	446.976	2
855	448.802	2
857.133	451.051	2
859.267	454.82	2
861.4	452.902	2
863.533	448.715	2
865.667	431.214	2
867.8	438.967	2
869.933	408.67	2
872.067	398.818	2
874.2	406.3	2
876.333	408.34	2
878.467	409.922	2
880.6	406.777	2
882.733	408.138	2
884.867	405.499	2
887	408.91	2
888.467	405.551	2
890.6	405.181	2
892.733	401.876	2
894.867	400.51	2
897	406.225	2
899.133	390.146	2
901.267	385.864	2
903.4	385.586	2
905.533	385.318	2
907.667	376.644	2
909.8	376.476	2
911.933	378.908	2
914.067	382.27	2
916.2	375.187	2
918.333	370.854	2
920.467	364.253	2
922.6	359.742	2
924.733	360.664	2
926.867	362.462	2
929	364.253	2
931.467	358.929	2
933.6	356.255	2
935.733	360.457	2
937.867	359.937	2
940	358.774	2
942.133	357.017	2
944.267	357.78	2
946.4	351.372	2
948.533	351.262	2
950.667	351.707	2
952.8	343.932	2
954.933	349.912	2
957.067	343.912	2
959.2	346.578	2
961.333	344.865	2
963.467	344.696	2
965.6	341.687	2
967.733	340.22	2
969.867	336.652	2
972	336.22	2
975.467	333.253	2
977.6	337.17	2
979.733	334.94	2
981.867	333.026	2
984	336.182	2
986.133	338.015	2
988.267	332.405	2
990.4	330.96	2
992.533	331.842	2
994.667	328.289	2
996.8	331.499	2
998.933	331.232	2
1001.07	329.606	2
1003.2	330.554	2
1005.33	329.723	2
1007.47	327.42	2
1009.6	323.822	2
1011.73	324.439	2
1013.87	320.903	2
1016	319.368	2
1017.47	324.854	2
1019.6	324.665	2
1021.73	330.867	2
1023.87	327.632	2
1026	325.834	2
1028.13	329.627	2
1030.27	323.599	2
1032.4	321.312	2
1034.53	321.29	2
1036.67	323.157	2
1038.8	325.57	2
1040.93	317.498	2
1043.07	326.4	2
1045.2	324.362	2
1047.33	321.182	2
1049.47	317.442	2
1051.6	321.591	2
1053.73	310.983	2
1055.87	315.9	2
1058	319.175	2
1060.47	317.424	2
1062.6	318.395	2
1064.73	315.985	2
1066.87	312.849	2
1069	317.079	2
1071.13	315.86	2
1073.27	313.971	2
1075.4	314.97	2
1077.53	312.351	2
1079.67	312.829	2
1081.8	317.333	2
1083.93	315.021	2
1086.07	319.013	2
1088.2	313.652	2
1090.33	308.568	2
1092.47	313.67	2
1094.6	309.64	2
1096.73	313.996	2
1098.87	313.927	2
1101	308.737	2
1155.47	300.825	11	C#1, Dissociation
1157.6	300.115	11
1159.73	302.466	11
1161.87	298.683	11
1164	298.419	11
1166.13	297.791	11
1168.27	301.399	11
1170.4	302.508	11
1172.53	295.632	11
1174.67	300.147	11
1176.8	305.352	11
1178.93	311.632	11
1181.07	316.931	11
1183.2	324.758	11
1185.33	330.015	11
1187.47	335.705	11
1189.6	341.29	11
1191.73	345.33	11
1193.87	357.916	11
1196	372.212	11
1197.47	381.08	11
1199.6	392.583	11
1201.73	400.153	11
1203.87	413.938	11
1206	422.413	11
1208.13	433.963	11
1210.27	453.489	11
1212.4	470.817	11
1214.53	489.336	11
1216.67	505.506	11
1218.8	519.108	11
1220.93	530.908	11
1223.07	548.573	11
1225.2	556.69	11
1227.33	566.363	11
1229.47	581.275	11
1231.6	594.809	11
1233.73	606.627	11
1235.87	618.404	11
1238	629.078	11
1240.47	635.608	11
1242.6	645.335	11
1244.73	647.148	11
1246.87	649.314	11
1249	658.975	11
1251.13	674.67	11
1253.27	679.244	11
1255.4	686.496	11
1257.53	691.493	11
1259.67	702.626	11
1261.8	700.426	11
1263.93	712.782	11
1266.07	709.914	11
1268.2	715.327	11
1270.33	726.343	11
1272.47	743.973	11
1274.6	751.816	11
1276.73	766.732	11
1278.87	778.678	11
1281	786.748	11
1283.47	790.565	11
1285.6	794.138	11
1287.73	801.925	11
1289.87	805.995	11
1292	824.02	11
1294.13	836.669	11
1296.27	846.273	11
1298.4	860.387	11
1300.53	877.451	11
1302.67	880.887	11
1304.8	891.319	11
1306.93	892.019	11
1309.07	907.174	11
1311.2	932.759	11
1313.33	950.888	11
1315.47	967.269	11
1317.6	975.194	11
1319.73	986.628	11
1321.87	999.652	11
1324	1005.46	11
1325.47	1009.98	11
1327.6	1006.46	11
1329.73	1027.28	11
1331.87	1046.92	11
1334	1060.73	11
1336.13	1069.87	11
1338.27	1079.67	11
1340.4	1080.86	11
1342.53	1088.16	11
1344.67	1086.78	11
1346.8	1086.63	11
1348.93	1089.64	11
1351.07	1102.63	11
1353.2	1109.91	11
1355.33	1121.24	11
1357.47	1129.45	11
1359.6	1128.35	11
1361.73	1129.02	11
1363.87	1117.79	11
1366	1126.89	11
1368.47	1125.07	11
1370.6	1137.75	11
1372.73	1143.86	11
1374.87	1157.36	11
1377	1164.45	11
1379.13	1159.8	11
1381.27	1158.37	11
1383.4	1154.55	11
1385.53	1145.56	11
1387.67	1144.78	11
1389.8	1150.88	11
1391.93	1162.35	11
1394.07	1168.33	11
1396.2	1167.39	11
1398.33	1176.94	11
1400.47	1167.99	11
1402.6	1168.19	11
1404.73	1165.37	11
1406.87	1145.74	11
1409	1159.52	11
1412.47	1172.97	11
1414.6	1175.27	11
1416.73	1179.47	11
1418.87	1184.62	11
1421	1183.99	11
1423.13	1173.94	11
1425.27	1166.11	11
1427.4	1152.63	11
1429.53	1169.94	11
1431.67	1174.87	11
1433.8	1172.35	11
1435.93	1177.7	11
1438.07	1194.48	11
1440.2	1191.35	11
1442.33	1185.03	11
1444.47	1175.15	11
1446.6	1168.21	11
1448.73	1173.55	11
1450.87	1172.36	11
1453	1185.31	11
1493.47	1186.91	2	C#2, Formation The induction time is marked with diagonal stripes.
1495.6	1192.59	2
1497.73	1198.84	2
1499.87	1201.09	2
1502	1212.71	2
1504.13	1229.55	2
1506.27	1217.99	2
1508.4	965.802	2
1510.53	931.024	2
1512.67	938.464	2
1514.8	955.495	2
1516.93	900.697	2
1519.07	884.035	2
1521.2	853.307	2
1523.33	795.54	2
1525.47	799.007	2
1527.6	752.873	2
1529.73	754.241	2
1531.87	724.75	2
1534	704.031	2
1536.47	690.18	2
1538.6	683.179	2
1540.73	699.258	2
1542.87	708.402	2
1545	706.449	2
1547.13	708.633	2
1549.27	710.933	2
1551.4	704.609	2
1553.53	695.532	2
1555.67	686.517	2
1557.8	703.283	2
1559.93	712.18	2
1562.07	718.86	2
1564.2	723.004	2
1566.33	716.704	2
1568.47	691.127	2
1570.6	705.167	2
1572.73	681.378	2
1574.87	677.265	2
1577	679.363	2
1579.47	690.835	2
1581.6	685.756	2
1583.73	680.635	2
1585.87	686.271	2
1588	689.992	2
1590.13	688.415	2
1592.27	686.285	2
1594.4	690.476	2
1596.53	665.982	2
1598.67	673.031	2
1600.8	668.858	2
1602.93	636.192	2
1605.07	612.701	2
1607.2	601.942	2
1609.33	609.516	2
1611.47	572.14	2
1613.6	582.283	2
1615.73	586.512	2
1617.87	568.619	2
1620	588.343	2
1621.47	587.57	2
1623.6	597.157	2
1625.73	600.263	2
1627.87	595.038	2
1630	596.399	2
1632.13	600.619	2
1634.27	604.166	2
1636.4	603.989	2
1638.53	617.09	2
1640.67	610.088	2
1642.8	618.208	2
1644.93	616.56	2
1647.07	622.12	2
1649.2	616.881	2
1651.33	616.891	2
1653.47	620.649	2
1655.6	622.523	2
1657.73	628.745	2
1659.87	623.82	2
1662	631.852	2
1664.47	623.237	2
1666.6	626.849	2
1668.73	610.861	2
1670.87	601.142	2
1673	607.888	2
1675.13	585.583	2
1677.27	596.533	2
1679.4	599.475	2
1681.53	596.557	2
1683.67	604.496	2
1685.8	594.068	2
1687.93	575.681	2
1690.07	576.02	2
1692.2	570.029	2
1694.33	560.086	2
1696.47	570.093	2
1698.6	562.956	2
1700.73	554.761	2
1702.87	534.132	2
1705	523.535	2
1707.47	523.488	2
1709.6	507.29	2
1711.73	492.314	2
1713.87	483.537	2
1716	474.151	2
1718.13	480.089	2
1720.27	463.247	2
1722.4	442.833	2
1724.53	429.094	2
1726.67	423.819	2
1728.8	415.026	2
1730.93	405.16	2
1733.07	389.222	2
1735.2	387.217	2
1737.33	386.128	2
1739.47	382.961	2
1741.6	377.246	2
1743.73	373.037	2
1745.87	366.503	2
1748	356.912	2
1749.47	357.544	2
1751.6	353.42	2
1753.73	349.975	2
1755.87	348.883	2
1758	347.86	2
1760.13	347.837	2
1762.27	346.083	2
1764.4	337.399	2
1766.53	335.596	2
1768.67	333.744	2
1770.8	331.512	2
1772.93	330.174	2
1775.07	333.142	2
1777.2	330.336	2
1779.33	327.114	2
1781.47	323.662	2
1783.6	320.454	2
1785.73	318.241	2
1787.87	312.796	2
1790	315.499	2
1792.47	315.929	2
1794.6	314.438	2
1796.73	317.348	2
1798.87	315.1	2
1801	311.066	2
1803.13	307.009	2
1805.27	306.996	2
1807.4	303.596	2
1809.53	302.154	2
1811.67	301.199	2
1813.8	301.677	2
1815.93	300.944	2
1818.07	300.629	2
1820.2	297.379	2
1822.33	298.749	2
1824.47	293.651	2
1826.6	291.726	2
1828.73	289.186	2
1830.87	288.728	2
1833	291.925	2
1835.47	289.427	2
1837.6	291.793	2
1839.73	289.113	2
1841.87	283.989	2
1844	282.241	2
1846.13	280.5	2
1848.27	281.835	2
1850.4	279.528	2
1852.53	282.524	2
1854.67	278.724	2
1856.8	277.937	2
1858.93	280.789	2
1861.07	276.45	2
1863.2	276.198	2
1865.33	274.978	2
1867.47	274.45	2
1869.6	269.039	2
1871.73	273.272	2
1873.87	272.251	2
1876	272.746	2
1877.47	273.859	2
1879.6	268.465	2
1881.73	268.054	2
1883.87	267.446	2
1886	265.269	2
1888.13	265.266	2
1890.27	266.252	2
1892.4	264.631	2
1894.53	269.054	2
1896.67	267.662	2
1898.8	269.991	2
1900.93	264.115	2
1903.07	264.6	2
1905.2	260.39	2
1907.33	261.447	2
1909.47	255.136	2
1911.6	257.287	2
1913.73	261.783	2
1915.87	261.709	2
1918	262.201	2
1920.47	258.979	2
1922.6	258.73	2
1924.73	255.716	2
1926.87	254.318	2
1929	252.172	2
1931.13	250.457	2
1933.27	252.07	2
1935.4	253.946	2
1937.53	255.493	2
1939.67	252.743	2
1941.8	252.497	2
1943.93	249.867	2
1946.07	248.061	2
1948.2	247.572	2
1950.33	249.496	2
1952.47	248.736	2
1954.6	250.029	2
1956.73	248.868	2
1958.87	249.731	2
1961	249.322	2
1963.47	245.301	2
1965.6	244.564	2
1967.73	246.108	2
1969.87	243.002	2
1972	242.382	2
1974.13	242.33	2
1976.27	241.443	2
1978.4	241.288	2
1980.53	245.89	2
1982.67	242.978	2
1984.8	247.069	2
1986.93	242.609	2
1989.07	242.192	2
1991.2	239.371	2
1993.33	241.544	2
1995.47	236.095	2
1997.6	238.641	2
1999.73	239.93	2
2001.87	240.012	2
2004	243.166	2
2006.47	242.173	2
2008.6	237.718	2
2010.73	236.721	2
2012.87	236.753	2
2015	237.028	2
2017.13	236.402	2
2019.27	233.457	2
2021.4	236.387	2
2023.53	236.907	2
2025.67	238.185	2
2027.8	235.933	2
2029.93	232.756	2
2032.07	235.185	2
2034.2	233.609	2
2036.33	229.352	2
2038.47	229.192	2
2040.6	230.066	2
2042.73	233.911	2
2044.87	232.227	2
2047	232.692	2
2048.47	235.229	2
2050.6	230.916	2
2052.73	233.342	2
2054.87	227.511	2
2057	226.058	2
2059.13	229.679	2
2061.27	232.52	2
2063.4	229.948	2
2065.53	230.475	2
2067.67	230.197	2
2069.8	228.579	2
2071.93	229.828	2
2074.07	229.472	2
2076.2	224.551	2
2078.33	223.599	2
2080.47	225.957	2
2082.6	226.604	2
2084.73	226.8	2
2086.87	226.809	2
2089	225.759	2
2091.47	223.486	2
2093.6	222.527	2
2095.73	223.352	2
2097.87	223.427	2
2100	221.603	2
2102.13	224.115	2
2104.27	226.299	2
2106.4	222.973	2
2108.53	224.397	2
2110.67	220.409	2
2112.8	218.778	2
2114.93	217.057	2
2117.07	219.526	2
2119.2	218.909	2
2121.33	218.168	2
2123.47	220.275	2
2125.6	224.37	2
2127.73	220.563	2
2129.87	220.671	2
2132	220.131	2
2134.47	218.578	2
2136.6	218.016	2
2138.73	216.14	2
2140.87	219.947	2
2143	219.753	2
2145.13	219.428	2
2147.27	219.824	2
2149.4	216.645	2
2151.53	219.22	2
2153.67	216.929	2
2155.8	216.058	2
2157.93	217.213	2
2160.07	213.657	2
2162.2	217.381	2
2164.33	216.682	2
2166.47	217.768	2
2168.6	215.677	2
2170.73	213.483	2
2172.87	210.932	2
2175	214.254	2
2230.47	207.423	11	C#2, Dissociation
2232.6	211.061	11
2234.73	209.984	11
2236.87	209.431	11
2239	208.98	11
2241.13	210.759	11
2243.27	210.497	11
2245.4	211.625	11
2247.53	215.769	11
2249.67	217.387	11
2251.8	218.996	11
2253.93	225.497	11
2256.07	232.194	11
2258.2	236.758	11
2260.33	252.465	11
2262.47	255.5	11
2264.6	265.818	11
2266.73	275.897	11
2268.87	291.505	11
2271	300.903	11
2273.47	319.408	11
2275.6	330.081	11
2277.73	345.709	11
2279.87	359.518	11
2282	376.233	11
2284.13	386.716	11
2286.27	399.384	11
2288.4	410.515	11
2290.53	425.275	11
2292.67	438.647	11
2294.8	447.474	11
2296.93	454.635	11
2299.07	464.891	11
2301.2	471.768	11
2303.33	474.531	11
2305.47	484.874	11
2307.6	494.761	11
2309.73	498.396	11
2311.87	504.526	11
2314	508.072	11
2316.47	515.076	11
2318.6	523.229	11
2320.73	529.39	11
2322.87	532.688	11
2325	537.588	11
2327.13	546.036	11
2329.27	552.391	11
2331.4	559.47	11
2333.53	569.369	11
2335.67	572.737	11
2337.8	585.123	11
2339.93	592.967	11
2342.07	601.04	11
2344.2	601.635	11
2346.33	610.031	11
2348.47	616.138	11
2350.6	629.11	11
2352.73	639.759	11
2354.87	651.671	11
2357	662.333	11
2359.47	676.09	11
2361.6	677.414	11
2363.73	693.631	11
2365.87	693.565	11
2368	700.478	11
2370.13	714.466	11
2372.27	729.571	11
2374.4	743.81	11
2376.53	756.125	11
2378.67	763.699	11
2380.8	776.828	11
2382.93	790.114	11
2385.07	798.901	11
2387.2	804.608	11
2389.33	824.522	11
2391.47	832.199	11
2393.6	848.755	11
2395.73	862.089	11
2397.87	877.026	11
2400	893.053	11
2401.47	905.071	11
2403.6	911.138	11
2405.73	910.51	11
2407.87	919.023	11
2410	942.438	11
2412.13	951.05	11
2414.27	961.096	11
2416.4	973.15	11
2418.53	983.152	11
2420.67	995.031	11
2422.8	996.59	11
2424.93	994.422	11
2427.07	1001.87	11
2429.2	1002.17	11
2431.33	1008.08	11
2433.47	1023.66	11
2435.6	1024.73	11
2437.73	1031.04	11
2439.87	1035.41	11
2442	1034.7	11
2444.47	1037.07	11
2446.6	1040.84	11
2448.73	1029.92	11
2450.87	1036.8	11
2453	1047.56	11
2455.13	1053.05	11
2457.27	1059.36	11
2459.4	1056.03	11
2461.53	1064.22	11
2463.67	1060.9	11
2465.8	1057.22	11
2467.93	1052.58	11
2470.07	1053.65	11
2472.2	1067.17	11
2474.33	1070.62	11
2476.47	1073.8	11
2478.6	1078.86	11
2480.73	1080.28	11
2482.87	1084.36	11
2485	1079.08	11
2487.47	1077.7	11
2489.6	1071.22	11
2491.73	1079.66	11
2493.87	1081.65	11
2496	1082.84	11
2498.13	1085.61	11
2500.27	1090.35	11
2502.4	1095.94	11
2504.53	1090.53	11
2506.67	1083.16	11
2508.8	1082.01	11
2510.93	1072.16	11
2513.07	1089.21	11
2515.2	1088.74	11
2517.33	1094.61	11
2519.47	1092.72	11
2521.6	1094.22	11
2523.73	1096.36	11
2525.87	1094.28	11
2528	1094.25	11
2533.47	1088.35	11
2535.6	1097.05	11
2537.73	1094.38	11
2539.87	1099.01	11
2542	1101.27	11
2544.13	1105.05	11
2546.27	1089.19	11
2548.4	1093.14	11
2550.53	1087.48	11
2552.67	1082.59	11
2554.8	1087.84	11
2556.93	1096.03	11
2559.07	1100.72	11
2561.2	1110.31	11
2563.33	1103.07	11
2565.47	1099.85	11
2567.6	1098.58	11
2569.73	1092.19	11
2571.87	1084.38	11
2574	1086.41	11
2641.47	1103.02	2	C#3, Formation The induction time is marked with diagonal stripes.
2643.6	1106.25	2
2645.73	1114.91	2
2647.87	1122.52	2
2650	1143.24	2
2652.13	1144.54	2
2654.27	996.694	2
2656.4	837.269	2
2658.53	832.355	2
2660.67	826.998	2
2662.8	838.643	2
2664.93	860.896	2
2667.07	827.049	2
2669.2	816.562	2
2671.33	840.113	2
2673.47	857.914	2
2675.6	853.552	2
2677.73	859.416	2
2679.87	843.052	2
2682	854.286	2
2684.47	828.322	2
2686.6	839.116	2
2688.73	835.5	2
2690.87	829.697	2
2693	833.81	2
2695.13	835.685	2
2697.27	833.449	2
2699.4	828.8	2
2701.53	830.332	2
2703.67	809.848	2
2705.8	774.246	2
2707.93	783.184	2
2710.07	771.168	2
2712.2	777.807	2
2714.33	779.716	2
2716.47	781.627	2
2718.6	770.186	2
2720.73	773.321	2
2722.87	775.155	2
2725	782.841	2
2726.47	778.391	2
2728.6	797.167	2
2730.73	789.38	2
2732.87	802.598	2
2735	794.433	2
2737.13	798.951	2
2739.27	796.223	2
2741.4	789.658	2
2743.53	793.381	2
2745.67	799.048	2
2747.8	808.347	2
2749.93	809.293	2
2752.07	780.267	2
2754.2	722.228	2
2756.33	715.166	2
2758.47	667.65	2
2760.6	675.744	2
2762.73	643.846	2
2764.87	648.708	2
2767	635.96	2
2769.47	631.265	2
2771.6	640.068	2
2773.73	643.49	2
2775.87	655.224	2
2778	654.221	2
2780.13	656.926	2
2782.27	649.583	2
2784.4	658.497	2
2786.53	642.008	2
2788.67	643.375	2
2790.8	642.986	2
2792.93	592.825	2
2795.07	590.631	2
2797.2	595.653	2
2799.33	580.567	2
2801.47	590.212	2
2803.6	598.342	2
2805.73	593.685	2
2807.87	608.658	2
2810	592.009	2
2812.47	606.783	2
2814.6	602.711	2
2816.73	599.892	2
2818.87	591.632	2
2821	583.214	2
2823.13	585.195	2
2825.27	580.701	2
2827.4	551.746	2
2829.53	552.128	2
2831.67	532.917	2
2833.8	530.734	2
2835.93	515.642	2
2838.07	505.097	2
2840.2	464.163	2
2842.33	462.939	2
2844.47	447.96	2
2846.6	437.402	2
2848.73	432.16	2
2850.87	428.041	2
2853	427.19	2
2855.47	413.972	2
2857.6	413.73	2
2859.73	408.46	2
2861.87	398.122	2
2864	391.182	2
2866.13	386.875	2
2868.27	377.073	2
2870.4	368.443	2
2872.53	365.975	2
2874.67	365.981	2
2876.8	362.586	2
2878.93	361.769	2
2881.07	362.589	2
2883.2	355.536	2
2885.33	352.374	2
2887.47	347.344	2
2889.6	344.768	2
2891.73	341.161	2
2893.87	340.342	2
2896	341.215	2
2904.47	332.423	2
2906.6	330.899	2
2908.73	327.979	2
2910.87	321.397	2
2913	317.249	2
2915.13	318.548	2
2917.27	317.746	2
2919.4	317.55	2
2921.53	317.803	2
2923.67	315.984	2
2925.8	314.964	2
2927.93	310.854	2
2930.07	312.31	2
2932.2	305.914	2
2934.33	303.553	2
2936.47	303.84	2
2938.6	298.84	2
2940.73	302.154	2
2942.87	301.806	2
2945	301.749	2
2946.47	297.435	2
2948.6	294.414	2
2950.73	291.262	2
2952.87	288.511	2
2955	288.909	2
2957.13	289.959	2
2959.27	291.21	2
2961.4	288.37	2
2963.53	286.685	2
2965.67	287.87	2
2967.8	283.67	2
2969.93	281.811	2
2972.07	279.873	2
2974.2	278.354	2
2976.33	276.485	2
2978.47	279.546	2
2980.6	278.154	2
2982.73	279.456	2
2984.87	280.948	2
2987	275.384	2
2989.47	273.574	2
2991.6	273.723	2
2993.73	270.999	2
2995.87	268.748	2
2998	272.298	2
3000.13	270.504	2
3002.27	272.42	2
3004.4	272.79	2
3006.53	270.044	2
3008.67	266.957	2
3010.8	263.163	2
3012.93	269.381	2
3015.07	263.562	2
3017.2	263.306	2
3019.33	264.776	2
3021.47	265.243	2
3023.6	263.207	2
3025.73	264.356	2
3027.87	261.241	2
3030	260.809	2
3032.47	259.114	2
3034.6	257.949	2
3036.73	256.376	2
3038.87	256.92	2
3041	257.228	2
3043.13	257.605	2
3045.27	255.23	2
3047.4	256.018	2
3049.53	253.72	2
3051.67	248.922	2
3053.8	252.098	2
3055.93	251.569	2
3058.07	249.055	2
3060.2	249.954	2
3062.33	251.054	2
3064.47	252.325	2
3066.6	252.621	2
3068.73	252.23	2
3070.87	250.621	2
3073	247.185	2
3074.47	246.361	2
3076.6	245.323	2
3078.73	243.485	2
3080.87	242.415	2
3083	246.17	2
3085.13	247.604	2
3087.27	245.626	2
3089.4	246.403	2
3091.53	242.568	2
3093.67	241.8	2
3095.8	240.195	2
3097.93	238.835	2
3100.07	241.285	2
3102.2	242.858	2
3104.33	242.413	2
3106.47	241.602	2
3108.6	242.876	2
3110.73	241.694	2
3112.87	237.874	2
3115	236.741	2
3117.47	236.771	2
3119.6	237.557	2
3121.73	236.612	2
3123.87	234.818	2
3126	238.995	2
3128.13	238.374	2
3130.27	239.297	2
3132.4	235.44	2
3134.53	233.452	2
3136.67	232.778	2
3138.8	234.317	2
3140.93	233.864	2
3143.07	234.378	2
3145.2	234.793	2
3147.33	234.121	2
3149.47	232.872	2
3151.6	233.857	2
3153.73	228.899	2
3155.87	232.048	2
3158	225.685	2
3160.47	226.641	2
3162.6	227.955	2
3164.73	231.029	2
3166.87	234.273	2
3169	231.203	2
3171.13	229.834	2
3173.27	227.618	2
3175.4	227.01	2
3177.53	223.255	2
3179.67	225.413	2
3181.8	224.266	2
3183.93	228.301	2
3186.07	229.705	2
3188.2	227.872	2
3190.33	229.518	2
3192.47	227.092	2
3194.6	227.087	2
3196.73	222.656	2
3198.87	223.6	2
3201	221.025	2
3203.47	221.836	2
3205.6	223.229	2
3207.73	224.089	2
3209.87	224.9	2
3212	226.598	2
3214.13	225.247	2
3216.27	225.047	2
3218.4	222.965	2
3220.53	220.712	2
3222.67	218.574	2
3224.8	216.612	2
3226.93	220.089	2
3229.07	221.823	2
3231.2	222.05	2
3233.33	224.129	2
3235.47	222.645	2
3237.6	220.21	2
3239.73	217.034	2
3241.87	220.837	2
3244	215.337	2
3246.47	218.784	2
3248.6	217.742	2
3250.73	220.292	2
3252.87	216.851	2
3255	220.19	2
3257.13	216.901	2
3259.27	219.956	2
3261.4	217.966	2
3263.53	216.28	2
3265.67	213.419	2
3267.8	216.33	2
3269.93	215.384	2
3272.07	219.042	2
3274.2	217.142	2
3276.33	217.696	2
3278.47	216.584	2
3280.6	215.24	2
3282.73	215.767	2
3284.87	212.781	2
3287	209.867	2
3289.47	214.034	2
3291.6	215.86	2
3293.73	218.158	2
3295.87	216.206	2
3298	217.956	2
3300.13	213.442	2
3302.27	214.887	2
3304.4	213.151	2
3306.53	210.947	2
3308.67	209.956	2
3310.8	213.004	2
3312.93	211.001	2
3315.07	214.735	2
3317.2	212.103	2
3319.33	211.696	2
3321.47	213.9	2
3323.6	212.402	2
3325.73	209.895	2
3327.87	210.16	2
3330	208.723	2
3332.47	206.625	2
3334.6	208.224	2
3336.73	212.768	2
3338.87	209.341	2
3341	214.437	2
3343.13	212.209	2
3345.27	209.846	2
3347.4	209.531	2
3349.53	205.666	2
3351.67	207.455	2
3353.8	206.914	2
3355.93	207.45	2
3358.07	209.685	2
3360.2	211.046	2
3362.33	211.366	2
3364.47	207.779	2
3366.6	208.061	2
3368.73	207.56	2
3370.87	208.821	2
3373	208.379	2
3633.47	187.803	11	C#3, Dissociation
3635.6	187.123	11
3637.73	187.791	11
3639.87	189.624	11
3642	189.474	11
3644.13	188.799	11
3646.27	190.563	11
3648.4	190.229	11
3650.53	191.757	11
3652.67	192.708	11
3654.8	194.977	11
3656.93	197.11	11
3659.07	199.171	11
3661.2	204.004	11
3663.33	207.518	11
3665.47	214.367	11
3667.6	222.977	11
3669.73	229.008	11
3671.87	238.078	11
3674	247.921	11
3676.13	258.317	11
3678.27	271.579	11
3680.4	282.526	11
3682.53	295.455	11
3684.67	312.763	11
3686.8	325.938	11
3688.93	344.67	11
3691.07	361.378	11
3693.2	375.861	11
3695.33	396.2	11
3697.47	406.406	11
3699.6	424.485	11
3701.73	438.823	11
3703.87	451.667	11
3706	464.803	11
3708.13	472.097	11
3710.27	489.038	11
3712.4	493.407	11
3714.53	502.31	11
3716.67	504.734	11
3718.8	513.174	11
3720.93	516.315	11
3723.07	522.123	11
3725.2	524.425	11
3727.33	531.715	11
3729.47	535.99	11
3731.6	542.222	11
3733.73	546.017	11
3735.87	551.026	11
3738	556.501	11
3740.13	560.107	11
3742.27	569.569	11
3744.4	579.715	11
3746.53	579.026	11
3748.67	583.234	11
3750.8	587.249	11
3752.93	595.464	11
3755.07	605.519	11
3757.2	607.305	11
3759.33	611.452	11
3761.47	621.605	11
3763.6	625.667	11
3765.73	628.368	11
3767.87	639.048	11
3770	648.147	11
3772.13	649.368	11
3774.27	661.465	11
3776.4	661.466	11
3778.53	674.968	11
3780.67	684.986	11
3782.8	686.773	11
3784.93	701.693	11
3787.07	703.449	11
3789.2	715.14	11
3791.33	723.008	11
3793.47	731.819	11
3795.6	745.787	11
3797.73	751.712	11
3799.87	761.224	11
3802	772.862	11
3804.13	779.546	11
3806.27	786.136	11
3808.4	796.449	11
3810.53	809.435	11
3812.67	824.234	11
3814.8	836.658	11
3816.93	839.5	11
3819.07	854.917	11
3821.2	868.537	11
3823.33	878.677	11
3825.47	888.967	11
3827.6	902.31	11
3829.73	908.334	11
3831.87	919.302	11
3834	919.942	11
3836.13	938.01	11
3838.27	942.667	11
3840.4	947.154	11
3842.53	951.135	11
3844.67	960.028	11
3846.8	980.673	11
3848.93	968.6	11
3851.07	991.497	11
3853.2	991.323	11
3855.33	998.794	11
3857.47	1002.76	11
3859.6	1006.2	11
3861.73	1012.15	11
3863.87	1018.5	11
3866	1021.58	11
3868.13	1021.73	11
3870.27	1031	11
3872.4	1033.14	11
3874.53	1038.7	11
3876.67	1040.71	11
3878.8	1039.07	11
3880.93	1046.4	11
3883.07	1049.41	11
3885.2	1055.57	11
3887.33	1053	11
3889.47	1067.08	11
3891.6	1064.95	11
3893.73	1051.03	11
3895.87	1066.35	11
3898	1066.86	11
3900.13	1070.51	11
3902.27	1058.32	11
3904.4	1069.66	11
3906.53	1077.53	11
3908.67	1064.49	11
3910.8	1069.9	11
3912.93	1074.31	11
3915.07	1075.77	11
3917.2	1074.83	11
3919.33	1080.22	11
3921.47	1069.8	11
3923.6	1075.56	11
3925.73	1084.64	11
3927.87	1080.27	11
3930	1081.89	11
