# Supplementary material for: Effect of thermal formation/dissociation cycles on the kinetics of formation and pore-scale distribution of methane hydrates in porous media: a magnetic resonance imaging study
Source: Royal Society of Chemistry journal article supplement (doi:10.1039/d0se01705a), 2021-01-01
Supplement: d0se01705a4.xlsx [file d0se01705a4.xlsx]

## Sheet: MI vs Time for Natural
MI Variations vs. Time for the Natural Sediment Sample
Time (min)	MI (-)	System Temperature (°C)	Remarks
0	3307.43	2	Fully saturated with water at P = 7 MPa
93	975.828	2	Partially saturated with water at P = 3 MPa
109.8	974.269	11	Partially saturated with water at P = 7 MPa
111.933	970.62	11
114.067	968.044	11
116.2	926.992	11
118.333	886.167	11
120.467	857.483	11
122.6	841.406	11
124.733	823.229	11
126.867	815.581	11
129	810.037	11
131.8	811.821	11
133.933	812.517	11
136.067	814.547	11
138.2	811.763	11
140.333	814.666	11
142.467	812.845	11
144.6	820.53	11
146.733	815.555	11
148.867	815.118	11
151	813.568	11
168.467	812.151	2	C#1, Formation The induction time is marked with diagonal stripes.
170.6	817.205	2
172.733	829.052	2
174.867	846.691	2
177	859.236	2
179.133	876.738	2
181.267	886.851	2
183.4	907.392	2
185.533	930.804	2
187.667	955.039	2
189.8	984.498	2
191.933	999.561	2
194.067	1013.6	2
196.2	1019.04	2
198.333	1019.23	2
200.467	1017.77	2
202.6	1014.96	2
204.733	1013.47	2
206.867	1010.64	2
209	1020.51	2
211.467	1031.1	2
213.6	1027.46	2
215.733	1028.79	2
217.867	1032.34	2
220	1028.33	2
222.133	1017.18	2
224.267	1017.61	2
226.4	1017.78	2
228.533	1014.53	2
230.667	1020.05	2
232.8	1024.22	2
234.933	1029.96	2
237.067	1031.6	2
239.2	1031.32	2
241.333	1024.96	2
243.467	1024.85	2
245.6	1016.84	2
247.733	1013.69	2
249.867	1013.21	2
252	958.311	2
253.467	875.86	2
255.6	885.514	2
257.733	878.638	2
259.867	884.048	2
262	881.921	2
264.133	880.534	2
266.267	874.853	2
268.4	860.91	2
270.533	862.86	2
272.667	772.665	2
274.8	775.465	2
276.933	776.493	2
279.067	775.747	2
281.2	756.93	2
283.333	698.901	2
285.467	698.892	2
287.6	698.83	2
289.733	701.3	2
291.867	703.23	2
294	700.634	2
296.467	693.469	2
298.6	690.813	2
300.733	692.775	2
302.867	688.715	2
305	688.081	2
307.133	688.506	2
309.267	692.814	2
311.4	687.884	2
313.533	693.178	2
315.667	693.173	2
317.8	694.686	2
319.933	686.185	2
322.067	693.427	2
324.2	699.262	2
326.333	695.681	2
328.467	693.705	2
330.6	690.524	2
332.733	692.637	2
334.867	692.556	2
337	696.393	2
339.467	694.096	2
341.6	695.117	2
343.733	696.307	2
345.867	688.345	2
348	690.389	2
350.133	691.15	2
352.267	698.641	2
354.4	690.711	2
356.533	698.789	2
358.667	688.072	2
360.8	670.696	2
362.933	668.685	2
365.067	662.152	2
367.2	667.059	2
369.333	666.057	2
371.467	666.143	2
373.6	659.145	2
375.733	663.476	2
377.867	665.537	2
380	667.634	2
382.467	667.436	2
384.6	664.3	2
386.733	665.971	2
388.867	664.441	2
391	666.155	2
393.133	667.354	2
395.267	664.642	2
397.4	664.774	2
399.533	666.12	2
401.667	662.854	2
403.8	664.687	2
405.933	659.444	2
408.067	660.893	2
410.2	667.733	2
412.333	671.345	2
414.467	663.4	2
416.6	666.784	2
418.733	669.885	2
420.867	667.909	2
423	661.288	2
424.467	664.553	2
426.6	665.781	2
428.733	667.827	2
430.867	669.171	2
433	664.422	2
435.133	672.174	2
437.267	672.223	2
439.4	664.906	2
441.533	661.092	2
443.667	676.764	2
445.8	673.582	2
447.933	674.159	2
450.067	669.872	2
452.2	672.555	2
454.333	672.365	2
456.467	671.995	2
458.6	671.347	2
460.733	666.845	2
462.867	671.37	2
465	667.905	2
467.467	670.288	2
469.6	664.206	2
471.733	662.704	2
473.867	668.405	2
476	673.167	2
478.133	665.91	2
480.267	666.002	2
482.4	663.235	2
484.533	667.469	2
486.667	669.31	2
488.8	668.709	2
490.933	669.986	2
493.067	668.678	2
495.2	670.16	2
497.333	670.205	2
499.467	671.397	2
501.6	668.558	2
503.733	667.338	2
505.867	664.099	2
508	668.486	2
510.467	667.971	2
512.6	665.237	2
514.733	665.904	2
516.867	573.88	2
519	575.417	2
521.133	546.726	2
523.267	544.936	2
525.4	538.335	2
527.533	547.173	2
529.667	483.85	2
531.8	477.361	2
533.933	479.89	2
536.067	481.298	2
538.2	479.486	2
540.333	483.494	2
542.467	482.701	2
544.6	430.414	2
546.733	426.244	2
548.867	431.168	2
551	432.401	2
552.467	427.55	2
554.6	427.352	2
556.733	430.437	2
558.867	429.342	2
561	430.107	2
563.133	427.881	2
565.267	367.566	2
567.4	367.758	2
569.533	368.863	2
571.667	373.037	2
573.8	372.541	2
575.933	369.601	2
578.067	370.616	2
580.2	369.655	2
582.333	368.032	2
584.467	365.428	2
586.6	367.352	2
588.733	369.002	2
590.867	388.776	2
593	384.851	2
595.467	384.881	2
597.6	393.043	2
599.733	388.861	2
601.867	390.309	2
604	387.497	2
606.133	387.525	2
608.267	391.25	2
610.4	388.894	2
612.533	394.153	2
614.667	391.722	2
616.8	394.447	2
618.933	389.7	2
621.067	391.2	2
623.2	391.388	2
625.333	391.041	2
627.467	393.669	2
629.6	389.102	2
631.733	390.982	2
633.867	393.135	2
636	390.969	2
638.467	407.52	2
640.6	408.008	2
642.733	408.138	2
644.867	401.022	2
647	401.662	2
649.133	417.142	2
651.267	407.634	2
653.4	407.735	2
655.533	404.645	2
657.667	404.659	2
659.8	406.78	2
661.933	405.512	2
664.067	405.032	2
666.2	403.366	2
668.333	403.196	2
670.467	404.415	2
672.6	408.243	2
674.733	411.25	2
676.867	405.776	2
679	407.109	2
680.467	406.633	2
682.6	404.719	2
684.733	405.032	2
686.867	405.431	2
689	404.644	2
691.133	410.257	2
693.267	405.168	2
695.4	410.018	2
697.533	406.11	2
699.667	407.304	2
701.8	406.229	2
703.933	427.973	2
706.067	427.216	2
708.2	432.783	2
710.333	428.779	2
712.467	428.77	2
714.6	434.339	2
716.733	429.752	2
718.867	432.402	2
721	430.245	2
723.467	435.727	2
725.6	429.942	2
727.733	427.493	2
729.867	426.948	2
732	426.084	2
734.133	425.689	2
736.267	429.596	2
738.4	428.958	2
740.533	428.921	2
742.667	427.182	2
744.8	423.682	2
746.933	425.764	2
749.067	427.474	2
751.2	420.804	2
753.333	425.311	2
755.467	424.978	2
757.6	424.862	2
759.733	438.115	2
761.867	438.358	2
764	436.782	2
766.467	436.275	2
768.6	438.502	2
770.733	433.776	2
772.867	436.578	2
775	435.186	2
777.133	437.854	2
779.267	436.2	2
781.4	434.82	2
783.533	434.282	2
785.667	440.461	2
787.8	438.394	2
789.933	437.912	2
792.067	433.786	2
794.2	441.856	2
796.333	441.987	2
798.467	444.538	2
800.6	426.535	2
802.733	429.831	2
804.867	429.333	2
807	427.957	2
808.467	426.88	2
810.6	429.39	2
812.733	427.029	2
814.867	423.532	2
817	424.366	2
819.133	424.38	2
821.267	426.924	2
823.4	428.742	2
825.533	428.059	2
827.667	428.17	2
829.8	431.122	2
831.933	425.606	2
834.067	426.499	2
836.2	426.255	2
838.333	425.703	2
840.467	423.049	2
842.6	437.119	2
844.733	441.48	2
846.867	439.309	2
849	439.821	2
851.467	438.159	2
853.6	438.869	2
855.733	436.412	2
857.867	434.346	2
860	435.656	2
862.133	434.45	2
864.267	441.604	2
866.4	438.771	2
868.533	437.787	2
870.667	436.184	2
872.8	441.493	2
874.933	438.048	2
877.067	436.226	2
879.2	438.932	2
881.333	436.502	2
883.467	432.934	2
885.6	437.343	2
887.733	433.794	2
889.867	431.043	2
892	429.945	2
894.467	430.86	2
896.6	429.161	2
898.733	433.887	2
900.867	429.715	2
903	432.901	2
905.133	438.084	2
907.267	431.837	2
909.4	436.388	2
911.533	434.949	2
913.667	434.519	2
915.8	432.613	2
917.933	431.33	2
920.067	444.041	2
922.2	437.937	2
924.333	428.656	2
926.467	433.29	2
928.6	434.192	2
930.733	434.585	2
932.867	441.73	2
935	432.893	2
936.467	437.249	2
938.6	433.703	2
940.733	435.896	2
942.867	434.841	2
945	432.12	2
947.133	435.676	2
949.267	388.561	2
951.4	389.119	2
953.533	391.444	2
955.667	389.597	2
957.8	394.051	2
959.933	381.836	2
962.067	383.426	2
964.2	384.721	2
966.333	384.723	2
968.467	384.615	2
970.6	378.539	2
972.733	378.456	2
974.867	378.466	2
977	373.642	2
979.467	367.437	2
981.6	367.655	2
983.733	364.084	2
985.867	365.603	2
988	367.265	2
990.133	357.406	2
992.267	363.396	2
994.4	358.624	2
996.533	362.334	2
998.667	365.742	2
1000.8	366.39	2
1002.93	368.289	2
1005.07	366.348	2
1007.2	366.901	2
1009.33	367.747	2
1011.47	364.49	2
1013.6	369.692	2
1015.73	367.959	2
1017.87	372.208	2
1020	365.942	2
1030.47	319.925	2
1032.6	325.085	2
1034.73	324.848	2
1036.87	328.216	2
1039	324.655	2
1041.13	328.156	2
1043.27	328.002	2
1045.4	327.983	2
1047.53	330.825	2
1049.67	327.755	2
1051.8	325.432	2
1053.93	303.871	2
1056.07	304.926	2
1058.2	309.038	2
1060.33	310.325	2
1062.47	295.872	2
1064.6	298.627	2
1066.73	303.967	2
1068.87	300.96	2
1071	301.201	2
1072.47	301.288	2
1074.6	301.898	2
1076.73	302.275	2
1078.87	302.759	2
1081	296.941	2
1083.13	300.197	2
1085.27	302.075	2
1087.4	301.511	2
1089.53	303.427	2
1091.67	301.8	2
1093.8	296.573	2
1095.93	298.873	2
1098.07	295.998	2
1100.2	295.137	2
1102.33	291.439	2
1104.47	293.366	2
1106.6	293.906	2
1108.73	296.136	2
1110.87	294.915	2
1113	293.776	2
1115.47	282.366	2
1117.6	283.088	2
1119.73	281.608	2
1121.87	279.558	2
1124	277.502	2
1126.13	278.449	2
1128.27	273.456	2
1130.4	273.366	2
1132.53	273.446	2
1134.67	273.037	2
1136.8	273.181	2
1138.93	273.327	2
1141.07	270.949	2
1143.2	272.047	2
1145.33	269.535	2
1147.47	269.329	2
1149.6	268.39	2
1151.73	267.759	2
1153.87	267.529	2
1156	265.543	2
1158.47	265.82	2
1160.6	265.436	2
1162.73	266.981	2
1164.87	268.063	2
1167	263.375	2
1169.13	265.726	2
1171.27	261.75	2
1173.4	261.614	2
1175.53	260.676	2
1177.67	263.796	2
1179.8	261.269	2
1181.93	260.171	2
1184.07	259.812	2
1186.2	256.237	2
1188.33	257.557	2
1190.47	258.941	2
1192.6	261.47	2
1194.73	255.332	2
1196.87	254.375	2
1199	255.885	2
1203.47	254.749	2
1205.6	254.877	2
1207.73	253.277	2
1209.87	250.724	2
1212	267.517	2
1214.13	253.419	2
1216.27	253.202	2
1218.4	252.634	2
1220.53	253.086	2
1222.67	253.607	2
1224.8	252.749	2
1226.93	255.338	2
1229.07	251.024	2
1231.2	249.68	2
1233.33	249.804	2
1235.47	251.806	2
1237.6	250.764	2
1239.73	247.381	2
1241.87	248.905	2
1244	249.501	2
1246.47	247.696	2
1248.6	246.974	2
1250.73	251.375	2
1252.87	250.023	2
1255	246.089	2
1257.13	246.752	2
1259.27	244.278	2
1261.4	243.533	2
1263.53	242.046	2
1265.67	243.194	2
1267.8	244.762	2
1269.93	243.187	2
1272.07	242.78	2
1274.2	244.662	2
1276.33	245.68	2
1278.47	241.287	2
1280.6	245.119	2
1282.73	243.727	2
1284.87	241.169	2
1287	242.428	2
1347.47	234.84	11	C#1, Dissociation
1349.6	234.72	11
1351.73	236.475	11
1353.87	232.552	11
1356	225.462	11
1358.13	222.586	11
1360.27	225.59	11
1362.4	221.069	11
1364.53	218.803	11
1366.67	221.627	11
1368.8	221.101	11
1370.93	221.789	11
1373.07	229.577	11
1375.2	229.695	11
1377.33	229.15	11
1379.47	232.825	11
1381.6	237.916	11
1383.73	241.12	11
1385.87	241.636	11
1388	245.84	11
1390.47	245.743	11
1392.6	249.03	11
1394.73	255.085	11
1396.87	257.599	11
1399	261.237	11
1401.13	270.197	11
1403.27	276.057	11
1405.4	277.893	11
1407.53	284.589	11
1409.67	293.288	11
1411.8	303.987	11
1413.93	308.615	11
1416.07	321.758	11
1418.2	326.602	11
1420.33	333.375	11
1422.47	342.289	11
1424.6	349.335	11
1426.73	359.661	11
1428.87	363.467	11
1431	376.015	11
1433.47	384.996	11
1435.6	391.707	11
1437.73	400.501	11
1439.87	408.214	11
1442	416.355	11
1444.13	418.419	11
1446.27	426.932	11
1448.4	432.439	11
1450.53	441.695	11
1452.67	445.728	11
1454.8	448.751	11
1456.93	453.586	11
1459.07	459.603	11
1461.2	465.145	11
1463.33	470.505	11
1465.47	468.468	11
1467.6	471.448	11
1469.73	471.837	11
1471.87	478.617	11
1474	484.002	11
1475.47	491.025	11
1477.6	487.788	11
1479.73	490.422	11
1481.87	490.058	11
1484	494.639	11
1486.13	500.681	11
1488.27	500.261	11
1490.4	504.67	11
1492.53	509.253	11
1494.67	513.545	11
1496.8	517.388	11
1498.93	519.464	11
1501.07	520.709	11
1503.2	526.183	11
1505.33	528.976	11
1507.47	536.026	11
1509.6	535.873	11
1511.73	537.677	11
1513.87	541.179	11
1516	547.312	11
1527.47	570.14	11
1529.6	572.283	11
1531.73	575.84	11
1533.87	580.892	11
1536	585.822	11
1538.13	590.44	11
1540.27	594.193	11
1542.4	594.2	11
1544.53	601.088	11
1546.67	603.4	11
1548.8	608.7	11
1550.93	608.825	11
1553.07	610.33	11
1555.2	614.618	11
1557.33	620.581	11
1559.47	625.004	11
1561.6	624.525	11
1563.73	625.036	11
1565.87	633.144	11
1568	630.202	11
1570.47	638.658	11
1572.6	637.615	11
1574.73	641.645	11
1576.87	640.958	11
1579	649.707	11
1581.13	652.633	11
1583.27	650.099	11
1585.4	658.515	11
1587.53	660.239	11
1589.67	653.372	11
1591.8	661.611	11
1593.93	658.398	11
1596.07	661.082	11
1598.2	661.797	11
1600.33	670.985	11
1602.47	671.977	11
1604.6	669.942	11
1606.73	675.641	11
1608.87	674.154	11
1611	678.497	11
1612.47	672.411	11
1614.6	683.246	11
1616.73	680.491	11
1618.87	676.697	11
1621	683.751	11
1623.13	683.298	11
1625.27	686.754	11
1627.4	686.673	11
1629.53	686.965	11
1631.67	685.591	11
1633.8	691.75	11
1635.93	690.99	11
1638.07	694.688	11
1640.2	695.821	11
1642.33	691.765	11
1644.47	691.79	11
1646.6	697.782	11
1648.73	695.937	11
1650.87	696.116	11
1653	693.792	11
1655.47	702.558	11
1657.6	702.653	11
1659.73	699.959	11
1661.87	705.92	11
1664	700.152	11
1666.13	700.668	11
1668.27	698.052	11
1670.4	703.932	11
1672.53	699.915	11
1674.67	703.412	11
1676.8	702.802	11
1678.93	703.234	11
1681.07	707.443	11
1683.2	703.906	11
1685.33	702.42	11
1687.47	703.825	11
1689.6	704.551	11
1691.73	702.796	11
1693.87	704.97	11
1696	701.488	11
1698.47	704.388	11
1700.6	711.248	11
1702.73	705.253	11
1704.87	711.867	11
1707	705.508	11
1709.13	708.664	11
1711.27	709.095	11
1713.4	712.963	11
1715.53	710.786	11
1717.67	711.745	11
1719.8	712.706	11
1721.93	708.612	11
1724.07	708.78	11
1726.2	708.347	11
1728.33	708.178	11
1730.47	709.021	11
1732.6	708.718	11
1734.73	714.971	11
1736.87	713.35	11
1739	709.507	11
1740.47	713.967	11
1742.6	712.663	11
1744.73	714.128	11
1746.87	706.258	11
1749	711.744	11
1751.13	712.426	11
1753.27	709.74	11
1755.4	708.963	11
1757.53	710.367	11
1759.67	714.149	11
1761.8	714.633	11
1763.93	709.263	11
1766.07	715.71	11
1768.2	712.669	11
1770.33	705.557	11
1772.47	712.058	11
1774.6	713.097	11
1776.73	712.089	11
1778.87	710.969	11
1781	711.163	11
1783.47	714.678	11
1785.6	710.767	11
1787.73	712.197	11
1789.87	711.672	11
1792	710.678	11
1794.13	716.05	11
1796.27	711.533	11
1798.4	713.103	11
1800.53	708.93	11
1802.67	709.257	11
1804.8	712.808	11
1806.93	713.617	11
1809.07	711.414	11
1811.2	711.981	11
1813.33	709.359	11
1815.47	709.586	11
1817.6	713.345	11
1819.73	720.083	11
1821.87	707.576	11
1824	709.748	11
1826.47	715.189	11
1828.6	713.731	11
1830.73	719.223	11
1832.87	710.492	11
1835	715.145	11
1837.13	713.067	11
1839.27	713.697	11
1841.4	712.34	11
1843.53	713.347	11
1845.67	717.805	11
1847.8	712.906	11
1849.93	717.613	11
1852.07	714.147	11
1854.2	713.383	11
1856.33	713.991	11
1858.47	711.23	11
1860.6	712.696	11
1862.73	717.38	11
1864.87	711.748	11
1867	710.038	11
1868.47	709.923	11
1870.6	715.888	11
1872.73	716.465	11
1874.87	714.67	11
1877	712.569	11
1879.13	713.665	11
1881.27	711.365	11
1883.4	711.758	11
1885.53	703.256	11
1887.67	699.33	11
1889.8	693.372	11
1891.93	701.639	11
1894.07	694.501	11
1896.2	698.964	11
1898.33	698.633	11
1900.47	698.084	11
1902.6	692.359	11
1904.73	695.032	11
1906.87	701.228	11
1909	701.719	11
1911.47	699.769	11
1913.6	698.679	11
1915.73	700.27	11
1917.87	704.239	11
1920	706.399	11
1922.13	702.251	11
1924.27	692.704	11
1926.4	704.396	11
1928.53	703.224	11
1930.67	701.158	11
1932.8	702.953	11
1934.93	704.668	11
1937.07	697.062	11
1939.2	702.5	11
1941.33	702.463	11
1943.47	704.376	11
1945.6	702.466	11
1947.73	695.656	11
1949.87	700.27	11
1952	696.766	11
1954.47	706.087	11
1956.6	704.954	11
1958.73	703.772	11
1960.87	700.789	11
1963	703.303	11
1965.13	704.03	11
1967.27	703.268	11
1969.4	706.73	11
1971.53	699.298	11
1973.67	695.316	11
1975.8	697.121	11
1977.93	697.934	11
1980.07	704.754	11
1982.2	698.72	11
1984.33	704.051	11
1986.47	702.461	11
1988.6	700.5	11
1990.73	703.789	11
1992.87	702.221	11
1995	701.694	11
2221.47	703.06	2	C#2, Formation The induction time is marked with diagonal stripes.
2223.6	715.162	2
2225.73	720.633	2
2227.87	743.441	2
2230	740.365	2
2232.13	701.328	2
2234.27	715.841	2
2236.4	727.314	2
2238.53	756.233	2
2240.67	754.415	2
2242.8	773.04	2
2244.93	779.267	2
2247.07	790.578	2
2249.2	795.449	2
2251.33	802.445	2
2253.47	802.239	2
2255.6	807.189	2
2257.73	808.71	2
2259.87	812.06	2
2262	815.276	2
2263.47	814.337	2
2265.6	815.954	2
2267.73	813.789	2
2269.87	807.376	2
2272	809.969	2
2274.13	811.52	2
2276.27	799.411	2
2278.4	798.944	2
2280.53	796.041	2
2282.67	812.622	2
2284.8	805.223	2
2286.93	800.576	2
2289.07	805.3	2
2291.2	807.721	2
2293.33	800.063	2
2295.47	811.714	2
2297.6	806.928	2
2299.73	777.38	2
2301.87	788.694	2
2304	794.658	2
2306.47	783.365	2
2308.6	785.611	2
2310.73	788.904	2
2312.87	790.387	2
2315	793.494	2
2317.13	784.971	2
2319.27	785.849	2
2321.4	787.326	2
2323.53	792.845	2
2325.67	783.645	2
2327.8	776.401	2
2329.93	782.979	2
2332.07	755.268	2
2334.2	755.164	2
2336.33	762.332	2
2338.47	761.302	2
2340.6	756.112	2
2342.73	759.934	2
2344.87	762.178	2
2347	758.336	2
2349.47	762.392	2
2351.6	762.853	2
2353.73	763.433	2
2355.87	759.873	2
2358	764.672	2
2360.13	768.335	2
2362.27	763.263	2
2364.4	764.22	2
2366.53	719.431	2
2368.67	721.972	2
2370.8	728.384	2
2372.93	724.142	2
2375.07	724.598	2
2377.2	728.496	2
2379.33	726.732	2
2381.47	727.445	2
2383.6	709.289	2
2385.73	712.987	2
2387.87	709.491	2
2390	709.941	2
2391.47	710.666	2
2393.6	711.15	2
2395.73	711.644	2
2397.87	716.124	2
2400	708.547	2
2402.13	712.965	2
2404.27	712.26	2
2406.4	715.342	2
2408.53	727.285	2
2410.67	710.036	2
2412.8	719.682	2
2414.93	716.34	2
2417.07	713.394	2
2419.2	705.51	2
2421.33	699.345	2
2423.47	699.255	2
2425.6	703.841	2
2427.73	703.359	2
2429.87	692.102	2
2432	702.978	2
2434.47	700.042	2
2436.6	699.663	2
2438.73	702.01	2
2440.87	702.533	2
2443	699.165	2
2445.13	693.586	2
2447.27	693.631	2
2449.4	693.758	2
2451.53	691.84	2
2453.67	689.887	2
2455.8	694.551	2
2457.93	696.31	2
2460.07	701.393	2
2462.2	694.769	2
2464.33	696.884	2
2466.47	693.314	2
2468.6	700.36	2
2470.73	697.38	2
2472.87	705.654	2
2475	703.486	2
2477.47	701.279	2
2479.6	705.012	2
2481.73	702.804	2
2483.87	704.003	2
2486	703.301	2
2488.13	704.433	2
2490.27	709.014	2
2492.4	703.98	2
2494.53	709.996	2
2496.67	676.454	2
2498.8	676.172	2
2500.93	668.455	2
2503.07	673.595	2
2505.2	672.906	2
2507.33	670.172	2
2509.47	669.552	2
2511.6	666.995	2
2513.73	675.523	2
2515.87	671.922	2
2518	677.409	2
2519.47	675.201	2
2521.6	666.579	2
2523.73	667.668	2
2525.87	663.893	2
2528	672.47	2
2530.13	669.749	2
2532.27	669.03	2
2534.4	656.073	2
2536.53	662.97	2
2538.67	665.517	2
2540.8	662.479	2
2542.93	660.262	2
2545.07	659.274	2
2547.2	643	2
2549.33	640.775	2
2551.47	635.122	2
2553.6	628.674	2
2555.73	624.144	2
2557.87	625.103	2
2560	629.383	2
2562.47	624.825	2
2564.6	596.804	2
2566.73	599.29	2
2568.87	599.036	2
2571	600.802	2
2573.13	597.79	2
2575.27	605.974	2
2577.4	601.552	2
2579.53	602.287	2
2581.67	604.511	2
2583.8	563.516	2
2585.93	559.598	2
2588.07	558.893	2
2590.2	549.236	2
2592.33	544.979	2
2594.47	520.725	2
2596.6	521.602	2
2598.73	514.841	2
2600.87	499.058	2
2603	495.583	2
2605.47	498.239	2
2607.6	503.262	2
2609.73	494.786	2
2611.87	486.154	2
2614	489.04	2
2616.13	485.096	2
2618.27	485.468	2
2620.4	487.272	2
2622.53	487.222	2
2624.67	482.836	2
2626.8	482.043	2
2628.93	484.625	2
2631.07	485.545	2
2633.2	491.1	2
2635.33	489.897	2
2637.47	492.132	2
2639.6	497.896	2
2641.73	495.99	2
2643.87	499.631	2
2646	490.713	2
2647.47	491.991	2
2649.6	496.087	2
2651.73	501.684	2
2653.87	495.312	2
2656	502.675	2
2658.13	486.142	2
2660.27	483.617	2
2662.4	485.269	2
2664.53	492.143	2
2666.67	479.439	2
2668.8	475.301	2
2670.93	479.547	2
2673.07	481.84	2
2675.2	474.539	2
2677.33	441.51	2
2679.47	450.204	2
2681.6	450.073	2
2683.73	449.053	2
2685.87	451.806	2
2688	447.255	2
2690.47	417.448	2
2692.6	427.256	2
2694.73	424.361	2
2696.87	428.267	2
2699	423.307	2
2701.13	417.978	2
2703.27	423.642	2
2705.4	420.264	2
2707.53	429.014	2
2709.67	434.191	2
2711.8	429.129	2
2713.93	432.016	2
2716.07	422.956	2
2718.2	425.228	2
2720.33	420.998	2
2722.47	423.47	2
2724.6	423.074	2
2726.73	386.89	2
2728.87	392.379	2
2731	398.212	2
2733.47	397.567	2
2735.6	379.667	2
2737.73	372.387	2
2739.87	372.267	2
2742	369.458	2
2744.13	362.969	2
2746.27	365.524	2
2748.4	368.41	2
2750.53	367.231	2
2752.67	371.127	2
2754.8	365.27	2
2756.93	357.177	2
2759.07	347.572	2
2761.2	352.015	2
2763.33	346.352	2
2765.47	344.55	2
2767.6	333.773	2
2769.73	335.132	2
2771.87	327.952	2
2774	318.159	2
2776.47	316.414	2
2778.6	314.309	2
2780.73	314.012	2
2782.87	308.342	2
2785	304.44	2
2787.13	303.007	2
2789.27	301.101	2
2791.4	293.116	2
2793.53	291.975	2
2795.67	292.031	2
2797.8	290.503	2
2799.93	289.925	2
2802.07	286.038	2
2804.2	292.742	2
2806.33	282.282	2
2808.47	278.146	2
2810.6	280.202	2
2812.73	283.163	2
2814.87	276.886	2
2817	273.992	2
2818.47	272.891	2
2820.6	272.766	2
2822.73	271.358	2
2824.87	270.09	2
2827	268.271	2
2829.13	267.852	2
2831.27	266.162	2
2833.4	267.381	2
2835.53	265.859	2
2837.67	264.907	2
2839.8	260.114	2
2841.93	263.608	2
2844.07	258.935	2
2846.2	261.406	2
2848.33	260.978	2
2850.47	258.211	2
2852.6	258.857	2
2854.73	260.067	2
2856.87	255.565	2
2859	257.983	2
2862.47	258.148	2
2864.6	256.409	2
2866.73	254.762	2
2868.87	256.209	2
2871	251.877	2
2873.13	253.682	2
2875.27	251.128	2
2877.4	252.924	2
2879.53	248.826	2
2881.67	247.521	2
2883.8	245.471	2
2885.93	245.372	2
2888.07	247.689	2
2890.2	247.072	2
2892.33	244.204	2
2894.47	260.517	2
2896.6	245.145	2
2898.73	246.869	2
2900.87	244.895	2
2903	249.184	2
2912.47	241.027	2
2914.6	242.425	2
2916.73	242.07	2
2918.87	238.626	2
2921	241.398	2
2923.13	239.494	2
2925.27	241.553	2
2927.4	240.225	2
2929.53	238.438	2
2931.67	235.64	2
2933.8	239.399	2
2935.93	238.185	2
2938.07	237.653	2
2940.2	234.258	2
2942.33	237.524	2
2944.47	237.455	2
2946.6	238.445	2
2948.73	238.692	2
2950.87	239.779	2
2953	234.203	2
2955.8	237.996	2
2957.93	236.21	2
2960.07	236.864	2
2962.2	233.32	2
2964.33	234.664	2
2966.47	232.382	2
2968.6	236.349	2
2970.73	233.472	2
2972.87	234.289	2
2975	233.646	2
3025.47	227.314	11	C#2, Dissociation
3027.6	226.738	11
3029.73	226.831	11
3031.87	228.261	11
3034	223.996	11
3036.13	217.466	11
3038.27	216.145	11
3040.4	216.312	11
3042.53	213.644	11
3044.67	214.344	11
3046.8	215.817	11
3048.93	215.68	11
3051.07	218.277	11
3053.2	218.827	11
3055.33	224.362	11
3057.47	224.827	11
3059.6	230.353	11
3061.73	237.481	11
3063.87	238.774	11
3066	241.674	11
3068.47	247.27	11
3070.6	250.017	11
3072.73	256.416	11
3074.87	263.872	11
3077	273.157	11
3079.13	282.079	11
3081.27	291.508	11
3083.4	301.043	11
3085.53	312.275	11
3087.67	320.59	11
3089.8	327.184	11
3091.93	337.372	11
3094.07	348.962	11
3096.2	352.616	11
3098.33	356.903	11
3100.47	360.582	11
3102.6	366.751	11
3104.73	368.262	11
3106.87	368.573	11
3109	376.112	11
3111.47	375.292	11
3113.6	382.223	11
3115.73	382.605	11
3117.87	384.611	11
3120	392.486	11
3122.13	396.563	11
3124.27	400.01	11
3126.4	401.619	11
3128.53	410.253	11
3130.67	415.044	11
3132.8	421.4	11
3134.93	424.052	11
3137.07	422.852	11
3139.2	432.846	11
3141.33	434.677	11
3143.47	441.004	11
3145.6	442.557	11
3147.73	445.426	11
3149.87	449.139	11
3152	450	11
3153.47	456.816	11
3155.6	460.483	11
3157.73	464.102	11
3159.87	463.564	11
3162	473.447	11
3164.13	473.462	11
3166.27	476.913	11
3168.4	479.249	11
3170.53	486.733	11
3172.67	487.114	11
3174.8	493.499	11
3176.93	490.665	11
3179.07	496.201	11
3181.2	508.122	11
3183.33	510.286	11
3185.47	513.464	11
3187.6	519.416	11
3189.73	524.175	11
3191.87	525.028	11
3194	525.858	11
3196.47	533.409	11
3198.6	535.226	11
3200.73	553.252	11
3202.87	554.682	11
3205	556.015	11
3207.13	559.792	11
3209.27	561.544	11
3211.4	564.847	11
3213.53	568.818	11
3215.67	575.131	11
3217.8	577.359	11
3219.93	576.567	11
3222.07	584.222	11
3224.2	589.886	11
3226.33	588.116	11
3228.47	592.385	11
3230.6	602.195	11
3232.73	602.421	11
3234.87	606.667	11
3237	604.568	11
3239.47	607.338	11
3241.6	609.931	11
3243.73	614.24	11
3245.87	615.317	11
3248	618.955	11
3250.13	620.904	11
3252.27	625.539	11
3254.4	628.785	11
3256.53	630.223	11
3258.67	630.926	11
3260.8	632.112	11
3262.93	635.281	11
3265.07	635.243	11
3267.2	642.737	11
3269.33	642.88	11
3271.47	641.581	11
3273.6	651.191	11
3275.73	644.11	11
3277.87	650.846	11
3280	649.329	11
3282.47	655.969	11
3284.6	653.756	11
3286.73	655.79	11
3288.87	659.687	11
3291	655.982	11
3293.13	661.336	11
3295.27	660.911	11
3297.4	664.354	11
3299.53	663.105	11
3301.67	670.389	11
3303.8	669.582	11
3305.93	666.995	11
3308.07	675.233	11
3310.2	672.926	11
3312.33	673.172	11
3314.47	674.091	11
3316.6	673.472	11
3318.73	675.229	11
3320.87	677.328	11
3323	677.508	11
3324.47	680.772	11
3326.6	681.204	11
3328.73	677.598	11
3330.87	678.855	11
3333	681.386	11
3335.13	681.444	11
3337.27	681.562	11
3339.4	686.586	11
3341.53	684.704	11
3343.67	689.21	11
3345.8	687.079	11
3347.93	690.743	11
3350.07	686.094	11
3352.2	685.417	11
3354.33	680.888	11
3356.47	689.076	11
3358.6	685.065	11
3360.73	689.73	11
3362.87	681.626	11
3365	686.521	11
3367.47	686.248	11
3369.6	686.861	11
3371.73	687.505	11
3373.87	693.237	11
3376	687.074	11
3378.13	687.942	11
3380.27	691.602	11
3382.4	688.14	11
3384.53	689.772	11
3386.67	687.056	11
3388.8	692.081	11
3390.93	691.416	11
3393.07	690.469	11
3395.2	690.264	11
3397.33	691.008	11
3399.47	690.349	11
3401.6	690.541	11
3403.73	691.695	11
3405.87	694.081	11
3408	691.69	11
3410.47	687.013	11
3412.6	689.774	11
3414.73	696.634	11
3416.87	691.625	11
3419	691.238	11
3421.13	691.722	11
3423.27	690.759	11
3425.4	688.241	11
3427.53	691.658	11
3429.67	694.177	11
3431.8	693.766	11
3433.93	689.543	11
3436.07	693.949	11
3438.2	690.751	11
3440.33	689.737	11
3442.47	691.263	11
3444.6	691.353	11
3446.73	692.118	11
3448.87	692.013	11
3451	690.287	11
3452.47	691.892	11
3454.6	687.475	11
3456.73	692.515	11
3458.87	693.799	11
3461	694.919	11
3463.13	690.812	11
3465.27	687.936	11
3467.4	685.844	11
3469.53	690.994	11
3471.67	691.638	11
3473.8	686.552	11
3475.93	688.111	11
3478.07	689.956	11
3480.2	685.059	11
3482.33	690.395	11
3484.47	690.342	11
3486.6	693.27	11
3488.73	690.768	11
3490.87	690.975	11
3493	690.146	11
3495.47	686.389	11
3497.6	690.823	11
3499.73	689.307	11
3501.87	692.141	11
3504	692.309	11
3506.13	694.877	11
3508.27	692.55	11
3510.4	691.343	11
3512.53	689.66	11
3514.67	689.448	11
3516.8	693.812	11
3518.93	692.054	11
3521.07	695.477	11
3523.2	696.203	11
3525.33	692.539	11
3527.47	692.922	11
3529.6	693.842	11
3531.73	694.417	11
3533.87	693.199	11
3536	690.507	11
3538.47	691.929	11
3540.6	697.065	11
3542.73	694.858	11
3544.87	695.204	11
3547	691.867	11
3549.13	694.415	11
3551.27	689.21	11
3553.4	694.366	11
3555.53	693.146	11
3557.67	695.772	11
3559.8	693.73	11
3561.93	692.925	11
3564.07	698.408	11
3566.2	695.107	11
3568.33	696.187	11
3570.47	694.258	11
3572.6	691.225	11
3574.73	697.792	11
3576.87	690.96	11
3579	698.713	11
3580.47	691.203	11
3582.6	691.071	11
3584.73	695.965	11
3586.87	696.736	11
3589	691.983	11
3591.13	696.54	11
3593.27	692.477	11
3595.4	697.979	11
3597.53	695.802	11
3599.67	694.134	11
3601.8	696.213	11
3603.93	689.739	11
3606.07	691.847	11
3608.2	698.567	11
3610.33	697.815	11
3612.47	692.813	11
3614.6	692.058	11
3616.73	690.044	11
3618.87	692.027	11
3621	694.499	11
3784.47	689.7	2	C#3, Formation The induction time is marked with diagonal stripes.
3786.6	690.347	2
3788.73	695.097	2
3790.87	692.101	2
3793	707.683	2
3795.13	722.74	2
3797.27	700.064	2
3799.4	707.008	2
3801.53	723.214	2
3803.67	740.623	2
3805.8	755.056	2
3807.93	775.322	2
3810.07	791.969	2
3812.2	798.157	2
3814.33	811.606	2
3816.47	809.745	2
3818.6	815.161	2
3820.73	819.559	2
3822.87	812.735	2
3825	818.846	2
3826.47	820.44	2
3828.6	821.028	2
3830.73	820.461	2
3832.87	817.394	2
3835	820.919	2
3837.13	822.973	2
3839.27	831.996	2
3841.4	823.547	2
3843.53	820.699	2
3845.67	816.768	2
3847.8	817.671	2
3849.93	827.352	2
3852.07	825.822	2
3854.2	821.717	2
3856.33	804.77	2
3858.47	807.019	2
3860.6	797.115	2
3862.73	805.991	2
3864.87	786.942	2
3867	782.577	2
3869.47	781.575	2
3871.6	785.493	2
3873.73	783.83	2
3875.87	785.561	2
3878	784.962	2
3880.13	787.92	2
3882.27	788.573	2
3884.4	790.581	2
3886.53	786.346	2
3888.67	791.51	2
3890.8	790.783	2
3892.93	793.475	2
3895.07	769.107	2
3897.2	770.857	2
3899.33	765.341	2
3901.47	766.253	2
3903.6	762.939	2
3905.73	770.518	2
3907.87	769.171	2
3910	766.264	2
3912.47	771.319	2
3914.6	730.016	2
3916.73	732.593	2
3918.87	730.818	2
3921	737.053	2
3923.13	735.537	2
3925.27	714.499	2
3927.4	713.099	2
3929.53	689.73	2
3931.67	687.01	2
3933.8	691.244	2
3935.93	688.524	2
3938.07	682.258	2
3940.2	684.815	2
3942.33	685.616	2
3944.47	683.106	2
3946.6	680.993	2
3948.73	684.368	2
3950.87	680.086	2
3953	676.231	2
3954.47	671.997	2
3956.6	662.673	2
3958.73	671.911	2
3960.87	667.436	2
3963	663.302	2
3965.13	671.792	2
3967.27	658.808	2
3969.4	655.275	2
3971.53	656.777	2
3973.67	658.98	2
3975.8	649.485	2
3977.93	637.299	2
3980.07	641.052	2
3982.2	642.956	2
3984.33	640.458	2
3986.47	642.391	2
3988.6	643.205	2
3990.73	644.874	2
3992.87	644.765	2
3995	648.92	2
3997.47	646.648	2
3999.6	650.205	2
4001.73	652.279	2
4003.87	653.166	2
4006	652.474	2
4008.13	648.491	2
4010.27	650.018	2
4012.4	649.545	2
4014.53	652.204	2
4016.67	652.199	2
4018.8	639.693	2
4020.93	634.888	2
4023.07	640.134	2
4025.2	640.858	2
4027.33	625.796	2
4029.47	625.839	2
4031.6	621.223	2
4033.73	613.863	2
4035.87	621.456	2
4038	620.742	2
4040.47	622.207	2
4042.6	621.739	2
4044.73	625.234	2
4046.87	627.007	2
4049	633.365	2
4051.13	629.744	2
4053.27	626.496	2
4055.4	598.059	2
4057.53	599.95	2
4059.67	580.579	2
4061.8	585.323	2
4063.93	585.164	2
4066.07	585.779	2
4068.2	591.03	2
4070.33	587.006	2
4072.47	589.097	2
4074.6	590.219	2
4076.73	594.074	2
4078.87	595.168	2
4081	593.963	2
4082.47	574.132	2
4084.6	549.816	2
4086.73	551.936	2
4088.87	555.266	2
4091	553.968	2
4093.13	549.136	2
4095.27	526.67	2
4097.4	521.747	2
4099.53	526.175	2
4101.67	529.016	2
4103.8	508.446	2
4105.93	484.603	2
4108.07	481.72	2
4110.2	481.564	2
4112.33	479.432	2
4114.47	483.725	2
4116.6	482.271	2
4118.73	483.647	2
4120.87	486.236	2
4123	474.579	2
4125.47	491.082	2
4127.6	482.63	2
4129.73	482.897	2
4131.87	485.029	2
4134	489.904	2
4136.13	485.636	2
4138.27	486.378	2
4140.4	476.959	2
4142.53	480.514	2
4144.67	483.259	2
4146.8	481.785	2
4148.93	484.665	2
4151.07	482.085	2
4153.2	476.417	2
4155.33	474.72	2
4157.47	480.387	2
4159.6	481.706	2
4161.73	480.873	2
4163.87	485.768	2
4166	483.295	2
4168.47	487.132	2
4170.6	492.126	2
4172.73	484.598	2
4174.87	487.181	2
4177	490.885	2
4179.13	495.166	2
4181.27	493.099	2
4183.4	490.043	2
4185.53	490.883	2
4187.67	491.229	2
4189.8	493.252	2
4191.93	486.297	2
4194.07	490.85	2
4196.2	490.79	2
4198.33	491.417	2
4200.47	492.657	2
4202.6	484.372	2
4204.73	494.14	2
4206.87	490.361	2
4209	477.539	2
4221.47	466.347	2
4223.6	455.894	2
4225.73	463.123	2
4227.87	461.202	2
4230	458.562	2
4232.13	447.723	2
4234.27	448.899	2
4236.4	453.738	2
4238.53	447.836	2
4240.67	446.772	2
4242.8	435.832	2
4244.93	425.28	2
4247.07	417.267	2
4249.2	414.386	2
4251.33	410.199	2
4253.47	407.89	2
4255.6	410.462	2
4257.73	407.695	2
4259.87	402.487	2
4262	393.394	2
4263.47	395.573	2
4265.6	384.539	2
4267.73	374.81	2
4269.87	361.563	2
4272	366.875	2
4274.13	353.493	2
4276.27	353.466	2
4278.4	349.689	2
4280.53	341.533	2
4282.67	338.26	2
4284.8	333.001	2
4286.93	330.031	2
4289.07	324.382	2
4291.2	323.158	2
4293.33	318.701	2
4295.47	316.614	2
4297.6	314.646	2
4299.73	309.416	2
4301.87	310.383	2
4304	306.808	2
4327.47	311.53	2
4329.6	312.883	2
4331.73	310.752	2
4333.87	308.841	2
4336	312.144	2
4338.13	315.253	2
4340.27	312.364	2
4342.4	313.487	2
4344.53	312.987	2
4346.67	313.14	2
4348.8	313.62	2
4350.93	312.937	2
4353.07	309.831	2
4355.2	315.264	2
4357.33	312.164	2
4359.47	313.79	2
4361.6	314.171	2
4363.73	311.291	2
4365.87	308.868	2
4368	315.374	2
4369.47	312.27	2
4371.6	313.291	2
4373.73	312.681	2
4375.87	312.42	2
4378	315.158	2
4380.13	312.56	2
4382.27	314.214	2
4384.4	311.542	2
4386.53	313.022	2
4388.67	315.388	2
4390.8	312.412	2
4392.93	310.114	2
4395.07	315.398	2
4397.2	310.06	2
4399.33	309.923	2
4401.47	308.852	2
4403.6	311.16	2
4405.73	314.262	2
4407.87	309.118	2
4410	310.135	2
4440.47	302.306	11	C#3, Dissociation
4442.6	306.793	11
4444.73	304.98	11
4446.87	295.506	11
4449	287.762	11
4451.13	282.378	11
4453.27	281.859	11
4455.4	281.229	11
4457.53	281.157	11
4459.67	286.558	11
4461.8	284.944	11
4463.93	285.103	11
4466.07	288.999	11
4468.2	294.551	11
4470.33	297.404	11
4472.47	298.161	11
4474.6	307.576	11
4476.73	312.551	11
4478.87	315.534	11
4481	324.269	11
4483.47	329.824	11
4485.6	336.042	11
4487.73	344.611	11
4489.87	357.394	11
4492	366.431	11
4494.13	377.322	11
4496.27	386.408	11
4498.4	396.555	11
4500.53	405.485	11
4502.67	411.162	11
4504.8	426.221	11
4506.93	429.325	11
4509.07	431.107	11
4511.2	437.036	11
4513.33	439.789	11
4515.47	443.38	11
4517.6	446.348	11
4519.73	447.214	11
4521.87	451.3	11
4524	452.296	11
4526.47	459.083	11
4528.6	466.654	11
4530.73	466.141	11
4532.87	472.82	11
4535	472.419	11
4537.13	479.143	11
4539.27	483.736	11
4541.4	491.134	11
4543.53	495.025	11
4545.67	498.636	11
4547.8	499.74	11
4549.93	501.072	11
4552.07	507.403	11
4554.2	510.754	11
4556.33	514.785	11
4558.47	518.84	11
4560.6	523.806	11
4562.73	528.19	11
4564.87	530.2	11
4567	536.861	11
4569.47	536.761	11
4571.6	543.501	11
4573.73	548.071	11
4575.87	558.256	11
4578	556.571	11
4580.13	562.77	11
4582.27	564.68	11
4584.4	571.339	11
4586.53	573.106	11
4588.67	579.504	11
4590.8	586.202	11
4592.93	595.306	11
4595.07	599.516	11
4597.2	602.558	11
4599.33	605.076	11
4601.47	610.263	11
4603.6	615.385	11
4605.73	618.053	11
4607.87	625.198	11
4610	623.919	11
4611.47	630.803	11
4613.6	636.921	11
4615.73	643.416	11
4617.87	646.434	11
4620	647.323	11
4622.13	650.121	11
4624.27	650.238	11
4626.4	658.827	11
4628.53	654.761	11
4630.67	659.835	11
4632.8	667.994	11
4634.93	672.528	11
4637.07	679.959	11
4639.2	678.552	11
4641.33	681.659	11
4643.47	679.458	11
4645.6	684.491	11
4647.73	683.848	11
4649.87	681.876	11
4652	686.709	11
4654.47	691.334	11
4656.6	696.735	11
4658.73	698.82	11
4660.87	700.251	11
4663	704.196	11
4665.13	705.199	11
4667.27	703.26	11
4669.4	710.419	11
4671.53	706.936	11
4673.67	704.537	11
4675.8	704.842	11
4677.93	712.215	11
4680.07	715.501	11
4682.2	717.495	11
4684.33	717.903	11
4686.47	720.082	11
4688.6	719.87	11
4690.73	719.503	11
4692.87	717.9	11
4695	722.039	11
4697.47	720.287	11
4699.6	723.012	11
4701.73	727.223	11
4703.87	728.431	11
4706	723.103	11
4708.13	728.422	11
4710.27	730.299	11
4712.4	727.032	11
4714.53	728.675	11
4716.67	724.904	11
4718.8	728.121	11
4720.93	724.894	11
4723.07	729.807	11
4725.2	731.52	11
4727.33	735.295	11
4729.47	734.295	11
4731.6	729.458	11
4733.73	730.128	11
4735.87	729.936	11
4738	728.702	11
4739.47	725.087	11
4741.6	727.298	11
4743.73	732.977	11
4745.87	733.265	11
4748	732.463	11
4750.13	737.29	11
4752.27	734.532	11
4754.4	734.493	11
4756.53	726.236	11
4758.67	730.351	11
4760.8	731.437	11
4762.93	729.834	11
4765.07	733.788	11
4767.2	740.877	11
4769.33	737.636	11
4771.47	735.369	11
4773.6	738.062	11
4775.73	732.596	11
4777.87	733.707	11
4780	732.841	11
4782.47	729.386	11
4784.6	733.653	11
4786.73	736.227	11
4788.87	740.098	11
4791	741.727	11
4793.13	736.173	11
4795.27	731.934	11
4797.4	738.201	11
4799.53	733.582	11
4801.67	733.696	11
4803.8	728.366	11
4805.93	729.815	11
4808.07	735.347	11
4810.2	736.901	11
4812.33	734.949	11
4814.47	731.898	11
4816.6	734.967	11
4818.73	732.054	11
4820.87	732.691	11
4823	732.675	11
4825.47	732.372	11
4827.6	730.893	11
4829.73	732.645	11
4831.87	734.309	11
4834	735.853	11
4836.13	733.105	11
4838.27	728.225	11
4840.4	726.788	11
4842.53	725.317	11
4844.67	725.226	11
4846.8	722.693	11
4848.93	733.121	11
4851.07	729.979	11
4853.2	728.079	11
4855.33	733.043	11
4857.47	725.952	11
4859.6	726.131	11
4861.73	726.525	11
4863.87	722.032	11
4866	725.171	11
4867.47	721.266	11
4869.6	720.34	11
4871.73	730.394	11
4873.87	733.074	11
4876	724.938	11
4878.13	728.711	11
4880.27	721.759	11
4882.4	734.001	11
4884.53	733.328	11
4886.67	734.587	11
4888.8	745.191	11
4890.93	740.831	11
4893.07	742.104	11
4895.2	744.027	11
4897.33	742.502	11
4899.47	740.777	11
4901.6	737.987	11
4903.73	734.647	11
4905.87	728.382	11
4908	719.871	11
4910.47	719.909	11
4912.6	725.954	11
4914.73	724.037	11
4916.87	733.02	11
4919	730.046	11
4921.13	733.412	11
4923.27	732.511	11
4925.4	732.844	11
4927.53	727.107	11
4929.67	734.944	11
4931.8	739.921	11
4933.93	739.407	11
4936.07	735.502	11
4938.2	736.594	11
4940.33	734.661	11
4942.47	732.736	11
4944.6	726.276	11
4946.73	726.611	11
4948.87	723.759	11
4951	722.229	11
4953.47	745.006	11
4955.6	739.017	11
4957.73	741.827	11
4959.87	740.533	11
4962	741.624	11
4964.13	739.215	11
[truncated: 74 more rows]
