# Supplementary material for: Effect of thermal formation/dissociation cycles on the kinetics of formation and pore-scale distribution of methane hydrates in porous media: a magnetic resonance imaging study
Source: Royal Society of Chemistry journal article supplement (doi:10.1039/d0se01705a), 2021-01-01
Supplement: d0se01705a5.xlsx [file d0se01705a5.xlsx]

## Sheet: PSD_Synthetic Sediment Sample
Particle Size Distribution for the Synthetic Sediment Sample
Size (μm)	Distribution (wt.%)	Cumulative Distribution (wt.%)
155	0	0
165	0	0
175	7.63079	7.63079
185	13.6967	21.3275
195	23.7626	45.09
205	26.1553	71.2453
215	15.6354	86.8806
225	7.85192	94.7326
235	3.54664	98.2792
245	1.69798	99.9772
255	0.0228311	100
