# Supplementary material for: Effect of thermal formation/dissociation cycles on the kinetics of formation and pore-scale distribution of methane hydrates in porous media: a magnetic resonance imaging study
Source: Royal Society of Chemistry journal article supplement (doi:10.1039/d0se01705a), 2021-01-01
Supplement: d0se01705a6.xlsx [file d0se01705a6.xlsx]

## Sheet: PSD_Natural Sediment Sample
Particle Size Distribution for the Natural Sediment Sample
Size (μm)	Distribution (wt.%)	Cumulative Distribution (wt.%)
600	0.9	100
544	1.2	99.1
493	1.9	97.9
446	3.3	96
404	5.2	92.7
366	7.6	87.5
332	10.2	79.9
301	12	69.7
273	12.6	57.7
247	11.3	45.1
224	8.2	33.8
203	5.7	25.6
184	4.1	19.9
166	3	15.8
151	2.1	12.8
137	1.5	10.7
124	1.3	9.2
112	1	7.9
102	0.8	6.9
92.1	0.7	6.1
83.4	0.6	5.4
75.6	0.5	4.8
68.5	0.5	4.3
62.1	0.4	3.8
56.2	0.4	3.4
50.9	0.3	3
46.2	0.3	2.7
41.8	0.2	2.4
37.9	0.2	2.2
34.3	0.2	2
31.1	0.1	1.8
28.2	0.1	1.7
25.5	0.1	1.6
23.1	0.1	1.5
21	0.1	1.4
19	0.1	1.3
17.2	0.1	1.2
15.6	0.1	1.1
14.1	0.1	1
12.8	0.1	0.9
11.6	0.1	0.8
10.5	0.1	0.7
9.52	0	0.6
8.63	0	0.6
7.82	0	0.6
7.08	0	0.6
6.42	0	0.6
4.82	0	0.6
5.27	0	0.6
4.77	0	0.6
4.33	0	0.6
3.92	0	0.6
3.55	0	0.6
3.22	0	0.6
2.92	0	0.6
2.64	0	0.6
2.39	0	0.6
2.17	0	0.6
1.97	0.1	0.6
1.78	0.1	0.5
1.61	0.1	0.4
1.46	0.1	0.3
1.32	0.1	0.2
1.2	0.1	0.1
